# Supplementary material for: Role of Glycosyltransferases Modifying Type B Flagellin of Emerging Hypervirulent Clostridium difficile Lineages and Their Impact on Motility and Biofilm Formation
Source: PubMed Central journal article supplement (PMC5207246; doi:10.1074/jbc.m116.749523), 2016-10-04
Supplement: 10.1074_M116.749523_jbc.M116.749523-1.pdf [file 10.1074_M116.749523_jbc.M116.749523-1.pdf]

Role of glycosyltransferases modifying type B flagellin of emerging hypervirulent *Clostridium difficile* lineages and their impact on motility and adhesion

Esmeralda Valiente<sup>1</sup>, Laura Bouché<sup>2</sup>, Paul Hitchen<sup>2</sup>, Alexandra Faulds-Pain<sup>1</sup>, Mario Songane<sup>3</sup>, Lisa F. Dawson<sup>1</sup>, Elizabeth Donahue<sup>1</sup>, Richard A. Stabler<sup>1</sup>, Maria Panico<sup>2</sup>, Howard R. Morris<sup>2,5</sup>, Mona Bajaj-Elliott<sup>3</sup>, Susan M. Logan<sup>4</sup>, Anne Dell<sup>2</sup> and Brendan W. Wren<sup>1\*</sup>

Supplementary figure 1

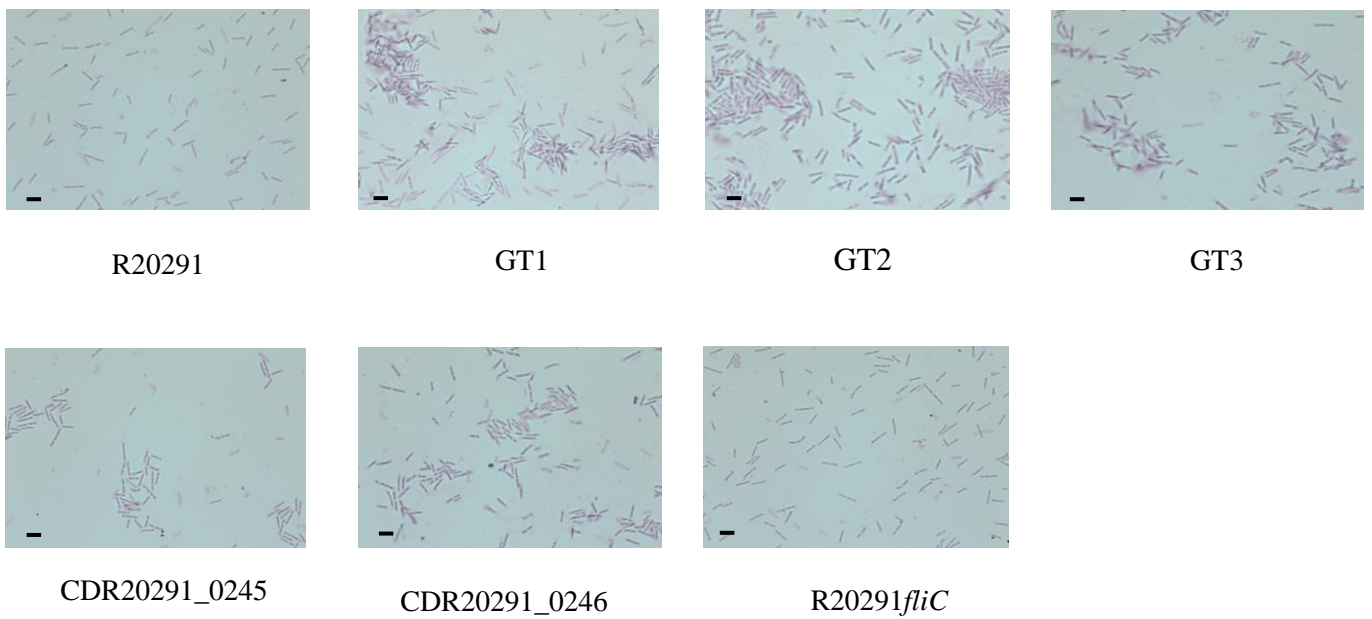

Supplementary figure 2

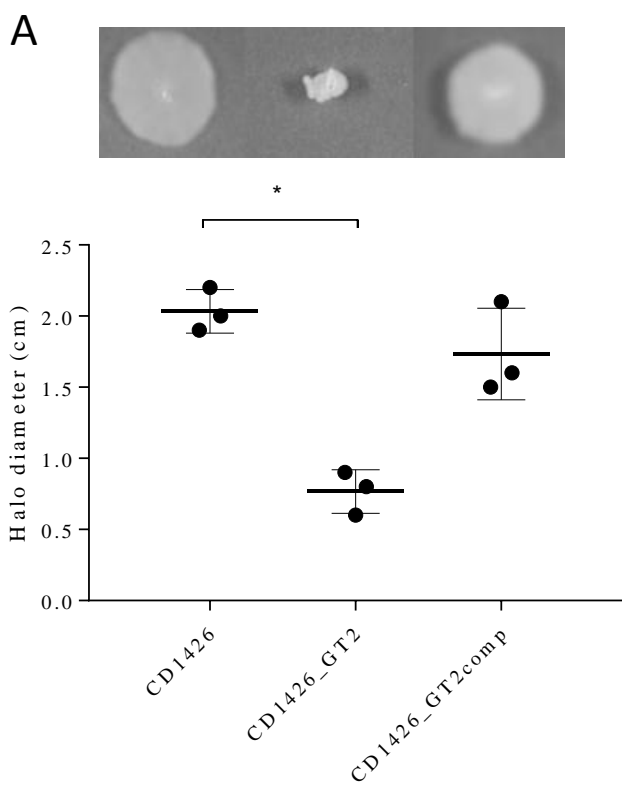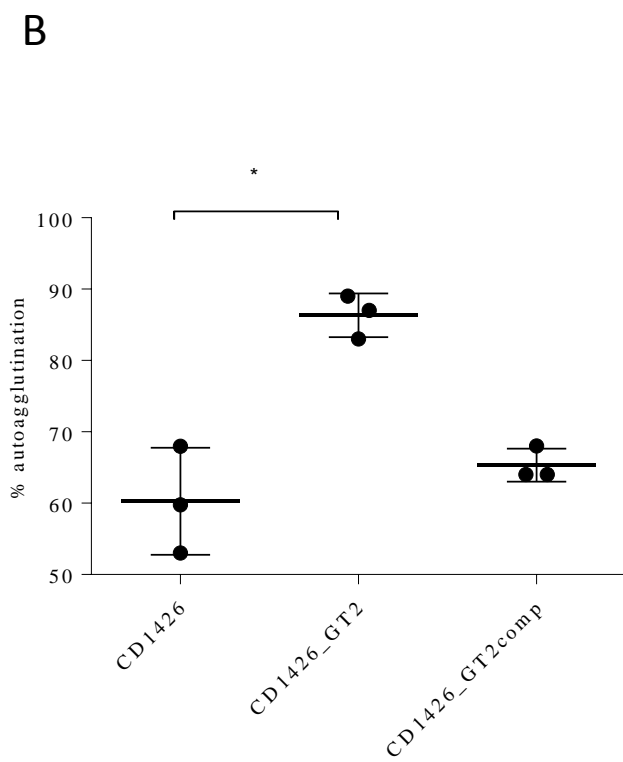

**Supplementary table 1.** List of oligonucleotides used in this study

| Primers used for screening mutants and make complements | Nucleotide sequence (5'—3') |
|---------------------------------------------------------|-----------------------------|
| <i>fliCF</i>                                            | GGGAAGAAACGTAAATGCACA       |
| <i>fliCR</i>                                            | TTGTGCCCTAATTTTGCTC         |
| GT1F                                                    | TCCTATGCTAAAGGTGAATGGT      |
|                                                         | T                           |
| GT1R                                                    | TCCCTAAATCTACTTGTGCTTG      |
|                                                         | T                           |
| GT2F                                                    | ACACCAATAGTGGTTAATGA        |
| GT2R                                                    | TATGTTTTACCAGTAGCCA         |
| GT3F                                                    | ACCTGTGTAAATGATGAAAG        |
| GT3R                                                    | GCATCTTGATGTAAGTATACCT      |
| CDR20291_0245F                                          | TGCGAAAAAGATTTGTGATGA       |
| CDR20291_0245R                                          | CCATCTTGAGGCTTCCTT          |
| CDR20291_0246F                                          | CAGTAGAAATAACTACATC         |
| CDR20291_0246R                                          | CAGTAGAAATAACTACATC         |
| GT2-EBS1 $\delta$                                       | CAGATTGTACAAATGTGGTGAT      |
|                                                         | AACAGATAAGTCGATCCAAC        |
|                                                         | AACTTACCTTTCTTTGT           |
| GT2-EBS2                                                | TGAACGCAAGTTTCTAATTTTCG     |
|                                                         | GTTGAAGATCGATAGAGGAAA       |
|                                                         | GTGTCT                      |
| GT2-IBS                                                 | AAAAGCTTATAATTATCCTTAT      |
|                                                         | CTTCCGATGGAGGTGCGCCAG       |
|                                                         | ATAGGGTG                    |
| GT3-EBS1 $\delta$                                       | CAGATTGTACAAATGTGGTGAT      |
|                                                         | AACAGATAAGTCGAGGAATGT       |
|                                                         | AACTTACCTTTCTTTGT           |
| GT3-EBS2                                                | TGAACGCAAGTTTCTAATTTTCG     |
|                                                         | GTTTAAAGTCGATAGAGGAAA       |
|                                                         | GTGTCT                      |
| GT3-IBS                                                 | AAAAAGCTTATAATTATCCTTA      |
|                                                         | CTTTACGAGGAAGTGCGCCAG       |
|                                                         | ATAGGGTG                    |
| EBS universal                                           | CGAAATTAGAACTTGC GTTCA      |
|                                                         | GTAAAC                      |
| RAM-F                                                   | ACGCGTTATATTGATAAAAATA      |
|                                                         | ATAATAGTGGG                 |
| RAM-R                                                   | ACGCGTGCGACTCATAGAATTA      |
|                                                         | TTTCTCCCG                   |
| GT1EcoRI_F                                              | ATAGAATTCATTGGATATAGAA      |
|                                                         | GAAAGGG                     |
| GT1XbaI_R                                               | ATATCTAGATCTATTTGATTAT      |
|                                                         | ATGTC                       |
| GT2NdeI_F                                               | TATGAATACACCAATAGTGGT *     |
| GT2 EcoRI_R                                             | ATCGAATTCACAAGACATTCCCT     |
|                                                         | CATAAAGT                    |
| GT3_EcoRI_F                                             | ATAGAATTCAATGAATCACCAA      |
|                                                         | TAGTG                       |
| GT3_XbaI_R                                              | ATATCTAGAGTCCTCAGTGAAT      |

|                         |                                      |
|-------------------------|--------------------------------------|
|                         | TTTCC                                |
| CDR20291_0245EcoRI_F    | ATAGAATTCATGAAAAGATTA<br>ATGATTTTAGG |
| CDR20291_0245XbaI_R     | ATATCTAGATTA AAAAATTTTCT<br>ATCAT    |
| CDR20291_0246EcoRI_F    | ATAGAATTCTATGATAGATATG<br>AAGCTA     |
| CDR20291_0246XbaI_R     | ATATCTAGATTGCTTTATTTGA<br>TTCTA      |
| <hr/>                   |                                      |
| Primers used for RT-PCR |                                      |
| 1F                      | GTCTCAAAGACCACTATATTCT<br>G          |
| 1R                      | GGTAATATATCATTGGTTTATG<br>G          |
| 2F                      | CCAAGCCACTGATAAAAACTG                |
| 2R                      | CAAGACCCTGCTCTAT                     |
| 3F                      | GGTTTATATGGAATGACAAGC                |
| 3R                      | ACCTTTCTTCTTCAAATAGCT                |
| 4F                      | GACAGTATTAGAGATGGATAG<br>AG          |
| 4R                      | CAATAGAATCGGCTCCT                    |
| 5F                      | GTGAATTAGAAGAATTTGATAC<br>TG         |
| 5R                      | GCAATAGAATCGGCTCCTCT                 |
| 6F                      | GATGAAATCGAAGACTATCAG<br>C           |
| 6R                      | CATAAGTTTCACATGCAGG                  |
| 7F                      | GGCAAATACTTAGACGAGG                  |
| 7R                      | GAGTATCAATTCTATTATCAC                |
| 8F                      | GATGAGAGACAGGATTGTGG                 |
| 8R                      | CTCCCTGGCAATCTTGTAACC                |
| 9F                      | GATAGAATTA AAAGAACC                  |
| 9R                      | GCCTTACTTCATTTCCAC                   |
| luxS-F                  | G TACTTGATGGAGTAAAGG                 |
| luxS-R                  | TTGCATATTCCTTTGCC                    |
| Int-F                   | GTGTCTTGTATTGGGGG                    |
| Int-R                   | CCAGTATCAAGCCAAGCC                   |
| <i>fliCF</i>            | GGGAAGAAACGTAAATGCACA                |
| <i>fliCR</i>            | TTGTGCCCTAATTTTGCTC                  |

\*5' end is phosphorilated

**SUPPLEMENTARY FIGURE 1.** Optical microscopy images of R20291 and its corresponding flagellin modification mutants showing cell aggregation in the mutants. The bar corresponds to 1  $\mu\text{m}$ .

**SUPPLEMENTARY FIGURE 2. Motility and cell aggregation assays in RT 023 and GT2 mutant.**  
A. Motility in CD1426 (RT023) and corresponding modification mutant and complement; B. Cell aggregation in CD1426 and corresponding modification mutant and complement. Data presented as the mean  $\pm$  SEM from 3 independent experiments with three technical replicates each. Significant differences are marked with asterisk;  $p < 0.05$ .
